# Supplementary material for: Selenium-enriched polysaccharides from Pyracantha fortuneana (Se-PFPs) inhibit the growth and invasive potential of ovarian cancer cells through inhibiting β-catenin signaling
Source: PubMed Central journal article supplement (PMC5053732; doi:10.18632/oncotarget.8619), 2016-04-06
Supplement: oncotarget-07-28369-s001.pdf [file oncotarget-07-28369-s001.pdf]

## SUPPLEMENTARY MATERIALS

## METHODS

## Caspase activity assay

The activities of caspase-3 and -9 were determined by using commercial kit (Beyotime Institute, Nanjing, China) following the manufacturer's instructions. Briefly, HEY and SKOV3 cells were treated with 0, 200 and 400  $\mu\text{g/ml}$  of

Se-PFPs for 48 hrs and lysed with lysis buffer. After centrifugation, the supernatants were mixed with the substrate and reaction buffer, then incubated for 2 hrs at 37°C in the darkness. The fluorescent intensity at 405 nm was measured using a microplate reader. The activity of caspase was presented as the observed absorbance/100  $\mu\text{g}$  proteins.

## SUPPLEMENTARY FIGURES AND TABLE

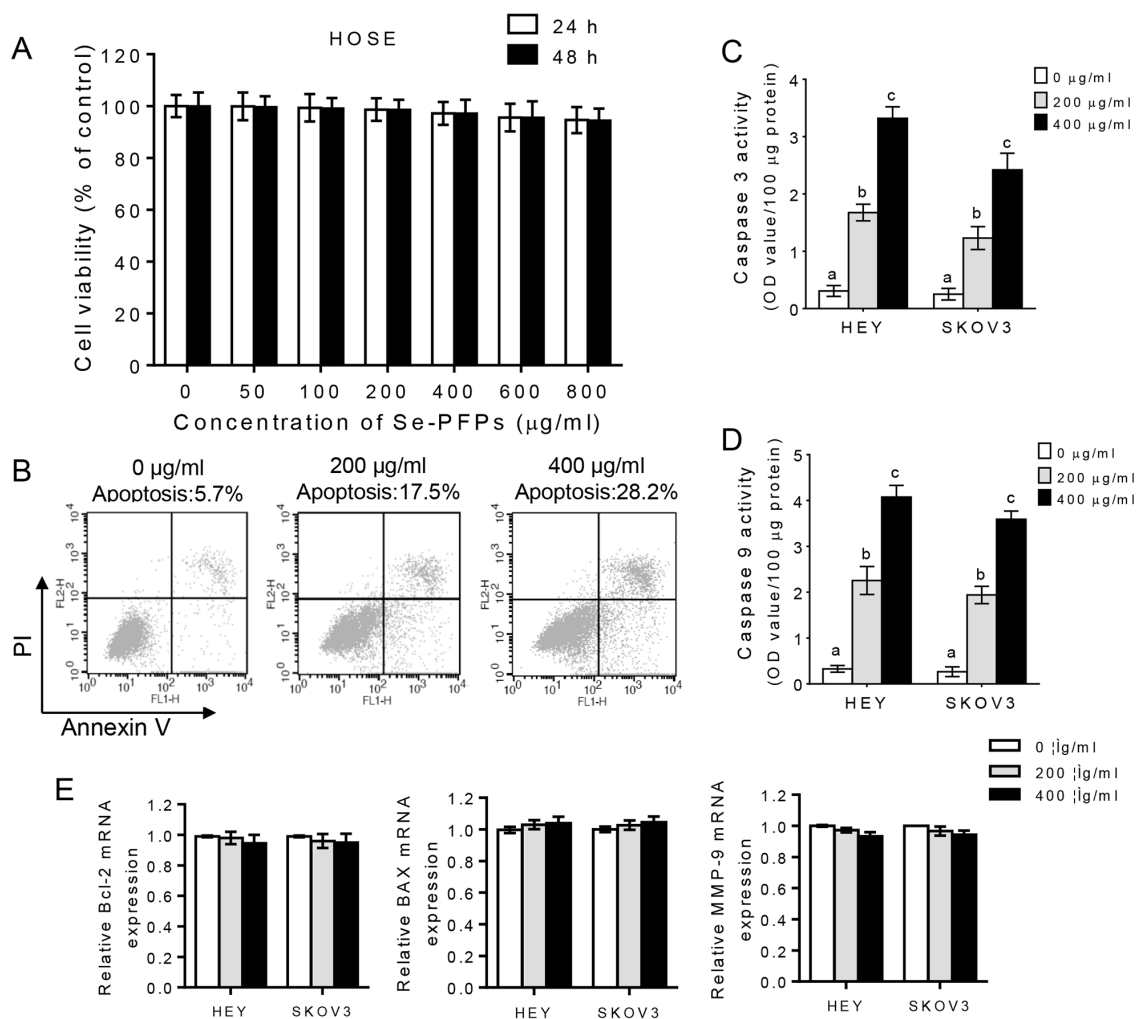

**Supplementary Figure S1:** **A.** The effect of Se-PFPs on viability of immortalized non-tumorigenic HOSE (human ovarian surface epithelial cell line) cells. HOSE cells were incubated with indicated doses of Se-PFPs for 24 and 48 hrs, respectively. Cell viability was detected using MTT method. The data are presented as the ratio to the untreated cells. **B.** Representative images for Se-PFPs-induced apoptosis in HEY cells assayed by Annexin V and PI stainings. 10,000 cells were analyzed by flow cytometry. **C.** Se-PFPs inhibit the activity of caspase-3 in HEY and SKOV3 cells. **D.** Se-PFPs inhibit the activity of caspase-9 in HEY and SKOV3 cells. **E.** Effects of Se-PFPs on the mRNA expression of Bcl-2, Bax and MMP-9 in HEY and SKOV3 cells after Se-PFPs treatment. The statistical analysis was carried out by using one-way ANOVA following Bonferroni *post hoc* test, and different letters above each column represent statistical difference at a level of  $p < 0.05$  ( $n=3$ ).

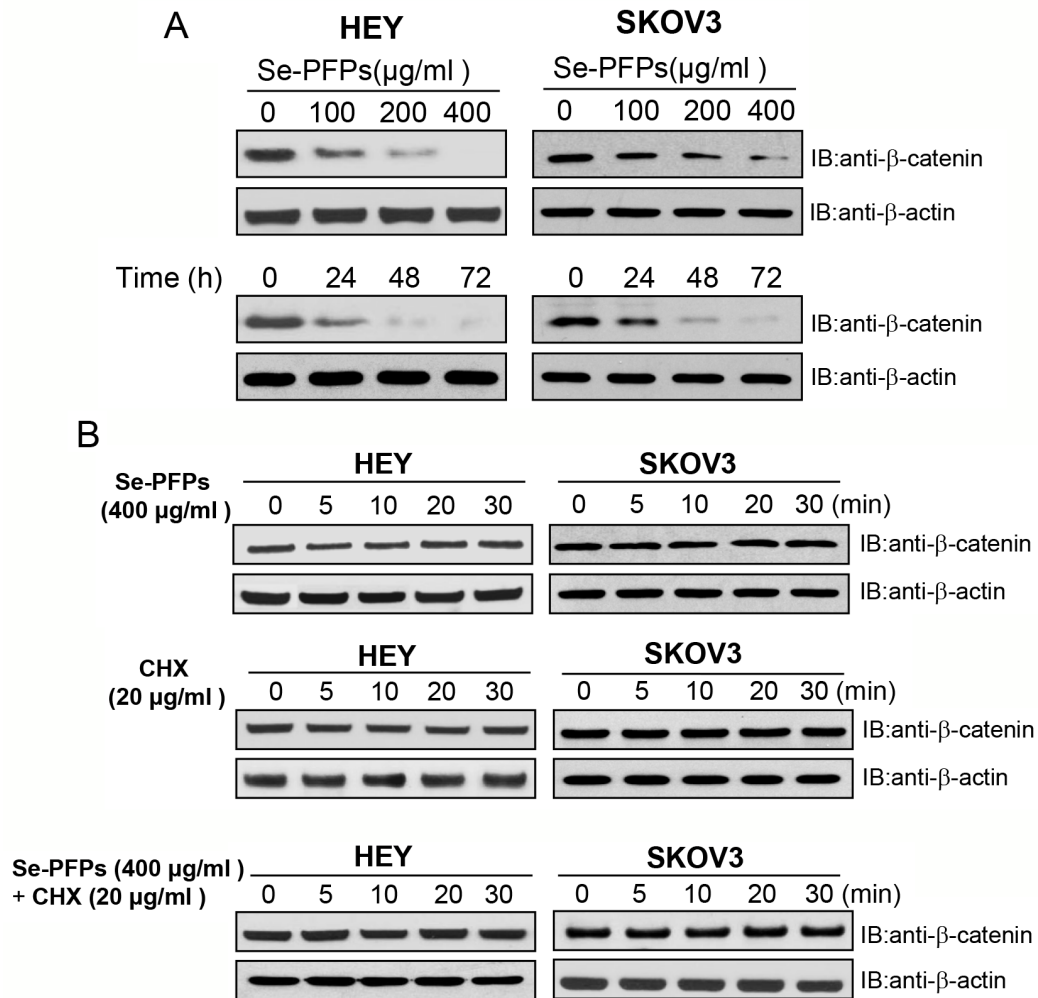

**Supplementary Figure S2: A.** Se-PFPs inhibit  $\beta$ -catenin expression in a concentration- and time-dependent manner. HEY and SKOV3 cells were incubated with different concentrations of Se-PFPs for 48 hrs (top panel) or with 400  $\mu\text{g/ml}$  Se-PFPs for different time points (bottom panel), and  $\beta$ -catenin expression was determined by Western blot. **B.** Effect of Se-PFPs and LiCl (GSK-3 $\beta$  inhibitor) on  $\beta$ -catenin expression in a short period (30 min). HEY and SKOV3 cells were incubated with 400  $\mu\text{g/ml}$  Se-PFPs and/or 20  $\mu\text{g/ml}$  CHX for various time points, then the level of total  $\beta$ -catenin was determined by Western blot.  $\beta$ -actin was used as a loading control.

Supplementary Table S1: The primers used for real time PCR

| Gene           | Forward primer       | Reverse primer       |
|----------------|----------------------|----------------------|
| E-cadherin     | tgcccagaaaatgaaaagg  | gtgtatgtggcaatgcgttc |
| N-cadherin     | gacaatgccctcaagtgtt  | ccattaagccgagtgatggt |
| Cytokeratin 19 | ttagagacggaacaggctct | aatccacctccacactgacc |
| Vimentin       | gagaactttgccgttgaagc | tccagcagcttctgtaggt  |
| ZEB1           | tgactgagtgaggaaaagc  | tggtgatgctgaaagagacg |
| ZEB2           | gagtggccgaaagagatcag | agtttggccagaaatggtg  |
| Bcl-2          | gaggattgtggccttcttg  | acagttccacaaggcatcc  |
| Bax            | ttgcttcagggttcatcc   | cagttgaagttgccgtcaga |
| MMP-9          | ttgacagcgacaagaagtgg | gccattcacgctgccttat  |
| b-catenin      | gccggctattgtagaagctg | gagtcccaaggagaccttcc |
| GAPDH          | acctgacctgccgtctagaa | tccaccacctgttctgta   |
